# Supplementary material for: Assessment of Pretreatment and Posttreatment Evolution of Neurofilament Light Chain Levels in Patients Who Develop Immune Effector Cell–Associated Neurotoxicity Syndrome
Source: PubMed Central journal article supplement (PMC9437827; doi:10.1001/jamaoncol.2022.3738), 2022-09-01
Supplement: jamaoncol-e223738-s001.pdf [file jamaoncol-e223738-s001.pdf]

## Supplemental Online Content

Butt OH, Zhou AY, Caimi PF, et al. Assessment of pretreatment and posttreatment evolution of neurofilament light chain levels in patients who develop immune effector cell–associated neurotoxicity syndrome. *JAMA Oncol*. Published online September 1, 2022. doi:10.1001/jamaoncol.2022.3738

### eMethods

### eResults

**eTable.** Demographic and oncologic characteristics of the study cohort

**eFigure 1.** Receiver operating characteristic curve classification of patients who develop any grade ICANS (1+) vs grade 0 for Platelet Count, Ferritin, CRP, Fibrinogen, LDH

**eFigure 2.** Univariate rank (Spearman’s) cross-correlation matrix comparing post-infusion day 1 (D1) blood biomarkers to baseline NfL, age, and total tumor burden and hierarchical clustering of the same terms

**eFigure 3.** Univariate rank (Spearman’s) cross-correlation matrix comparing during lymphodepletion blood biomarkers to baseline NfL, age, and total tumor burden and hierarchical clustering of the same terms

**eFigure 4.** Receiver operating characteristic curve classification of patients who develop grade 3+ ICANS vs grade 0-2 ICANS for baseline NfL and available post-infusion day 1 (D1) markers

**eFigure 5.** Receiver operating characteristic curve classification of patients who develop grade 3+ ICANS vs grade 0-2 for Platelet Count, Ferritin, CRP, Fibrinogen, and LDH

**eFigure 6.** Cross-Validation (12x) Mean Squared Error plot reflecting lasso (elastic) regression of 12 pre-treatment factors

**eFigure 7.** Univariate correlation between ICANS grade and available biomarkers at different time-points relative to lymphodepletion and CAR T infusion

This supplemental material has been provided by the authors to give readers additional information about their work.

## A. Supplemental Methods

### Expanded Variable definitions

#### *Pre-Infusion, Pre-lymphodepletion Variables*

| Name                           | Variable Type | Origin                          |
|--------------------------------|---------------|---------------------------------|
| Sex                            | Categorical   | Demographics                    |
| CNS Involvement                | Categorical   | Pre-infusion medical history    |
| History of Neurologic Disease* | Categorical   | Pre-infusion medical history    |
| History of Neuropathy          | Categorical   | Pre-infusion medical history    |
| History of Vincristine         | Categorical   | Pre-infusion medical history    |
| History of Cytarabine          | Categorical   | Pre-infusion medical history    |
| History of HD Methotrexate     | Categorical   | Pre-infusion medical history    |
| History of IT Methotrexate     | Categorical   | Pre-infusion medical history    |
| History of CNS Radiotherapy    | Categorical   | Pre-infusion medical history    |
| Tumor Burden                   | Continuous    | Per Pre-infusion PET Scan**     |
| Plasma NfL                     | Continuous    | Blood Draw prior to infusion*** |

\* Two patients had a history of stroke, two patients had a history of migraines, and one patient had a history of seizures. One patient with a history of stroke developed Grade 1 ICANS while the other developed Grade 4 ICANS. Neither patient with a history of migraine developed ICANS. Finally, the patient with a history of seizures developed Grade 1 ICANS.

\*\*Tumor burden was derived from the most recent PET scan prior to CAR T infusion (median 44 days (range [4-94]) for the complete cohort; median 45.5 days (range [7-94]) for the no ICANS group, median 34 days (range [4-81]) for ICANS group). Tumor burden was defined as the mean metabolic tumor volume (MTV) for each patient. First, ellipsoidal regions of interest (ROIs) were defined on attenuation-corrected images using the Affinity Viewer of the Hermes software package (Hermes Medical Solutions, Stockholm, Sweden). ROIs were next manually adjusted not to include adjacent physiologic activity. A local threshold of 41% of the maximum SUV for each defined lesion was used for segmentation (1,2). When true sites of disease were not confidently distinguished from physiological uptake, only focal lesions were included. The sum of the MTVs of all identifiable hypermetabolic lesions defined the patient MTV.

\*\*\*Baseline plasma NfL was obtained from archived (single-freeze/thaw) plasma obtained prior to CAR T infusion (median 9.5 days (range [3-61]) for the complete cohort; median 25 days (range [4-61]) for the no ICANS group, median 7 days (range [3-26]) for ICANS group).

#### *Pre-Infusion, Post-lymphodepletion Variables*

|                |            |                                                                                                  |
|----------------|------------|--------------------------------------------------------------------------------------------------|
| Platelet Count | Continuous | Earliest available laboratory data during lymphodepletion                                        |
| Ferritin       | Continuous | Earliest available laboratory data during lymphodepletion                                        |
| LDH            | Continuous | Earliest available laboratory data during lymphodepletion                                        |
| CRP            | Continuous | Earliest available laboratory data during lymphodepletion                                        |
| Fibrinogen     | Continuous | Earliest available laboratory data during lymphodepletion                                        |
| Plasma NfL     | Continuous | Archived plasma obtained during lymphodepletion, after the baseline sample and prior to infusion |

### *Post-Infusion Variables*

|                |            |                                                      |
|----------------|------------|------------------------------------------------------|
| Platelet Count | Continuous | Laboratory data on D1, D3, D5, and D7                |
| Ferritin       | Continuous | Laboratory data on D1, D3, D5, and D7                |
| LDH            | Continuous | Laboratory data on D1, D3, D5, and D7                |
| CRP            | Continuous | Laboratory data on D1, D3, D5, and D7                |
| Fibrinogen     | Continuous | Laboratory data on D1, D3, D5, and D7                |
| Plasma NfL     | Continuous | Archived plasma obtained on D1, D3, D7, D14, and D30 |
| CRS Grade      | Ordinal    | Peak CRS Grade                                       |
| ICANS Grade    | Ordinal    | Peak ICANS Grade                                     |

### *Cohort Size*

Cohort size was determined by extrapolating from preliminary work where baseline NfL for patients undergoing cellular therapy who did not develop ICANS (n = 9) was 28.3 +/- 9.1SD (Butt, et al, 2020). NfL levels in patients who developed ICANS was significantly higher (45.6 pg/ml, 125.2 pg/ml, and 62.8 pg/ml). Based on a conservative estimate of a 20% increase with an assumed 80% power and an alpha of 0.05, a target study group of 20 patients was needed assuming 10 ICANS patients and 10 non-ICANS patients. Thus, a target goal of at least 10 evaluable ICANS patients determined the inclusion window of 1.5 years. Inclusion criteria included available pre-infusion plasma (up to 6 weeks prior to completion of lymphodepletion). Exclusion criteria included dementia (n=1) or severe central nervous system (CNS) involvement (n=1). Exclusion criteria was defined to minimize secondary potential sources of NfL elevation which may bias the results (Khalil et al, 2018)

## B. Supplemental Results

### Detailed Patient Demographics

| ID | Age | Sex | Race     | Cancer History       | CAR T product            | Peak ICANS Score | Peak CRS Score |
|----|-----|-----|----------|----------------------|--------------------------|------------------|----------------|
| 1  | 75  | M   | white    | FL->DLBCL            | Axicabtagene Ciloleucel  | 3                | 2              |
| 2  | 60  | M   | asian    | DLBCL                | Axicabtagene Ciloleucel  | 0                | 2              |
| 3  | 58  | M   | white    | DLBCL                | Axicabtagene Ciloleucel  | 0                | 1              |
| 4  | 70  | M   | white    | DLBCL                | Axicabtagene Ciloleucel  | 0                | 1              |
| 5  | 58  | F   | black    | DLBCL/PTLD           | Axicabtagene Ciloleucel  | 3                | 1              |
| 6  | 67  | M   | white    | DLBCL                | Tisagenlecleucel         | 0                | 0              |
| 7  | 60  | M   | white    | DLBCL                | Axicabtagene Ciloleucel  | 3                | 2              |
| 8  | 67  | F   | white    | DLBCL                | Axicabtagene Ciloleucel  | 0                | 0              |
| 9  | 81  | M   | white    | PCBCL->DLBCL         | Axicabtagene Ciloleucel  | 0                | 0              |
| 10 | 77  | M   | white    | MZL->DLBCL           | Axicabtagene Ciloleucel  | 0                | 1              |
| 11 | 22  | M   | white    | pre-B ALL            | Tisagenlecleucel         | 0                | 1              |
| 12 | 64  | M   | white    | FL->DLBCL            | Tisagenlecleucel         | 0                | 1              |
| 13 | 79  | M   | white    | DLBCL                | Tisagenlecleucel         | 4                | 1              |
| 14 | 65  | M   | white    | DLBCL                | Axicabtagene Ciloleucel  | 0                | 1              |
| 15 | 78  | F   | white    | FL->DLBCL            | Axicabtagene Ciloleucel  | 1                | 1              |
| 16 | 68  | F   | white    | FL->DLBCL            | Axicabtagene Ciloleucel  | 0                | 2              |
| 17 | 57  | M   | black    | DLBCL/PTLD           | Axicabtagene Ciloleucel  | 0                | 1              |
| 18 | 57  | F   | white    | PMBL                 | Axicabtagene Ciloleucel  | 0                | 2              |
| 19 | 69  | F   | white    | DLBCL                | Axicabtagene Ciloleucel  | 3                | 2              |
| 20 | 58  | M   | white    | DLBCL                | Axicabtagene Ciloleucel  | 1                | 2              |
| 21 | 71  | F   | white    | DLBCL/FL             | Axicabtagene Ciloleucel  | 0                | 0              |
| 22 | 61  | F   | white    | DLBCL                | Axicabtagene Ciloleucel  | 1                | 0              |
| 23 | 59  | F   | white    | DLBCL/FL             | Axicabtagene Ciloleucel  | 0                | 1              |
| 24 | 79  | M   | white    | Mantle Cell/MIPI 6.9 | Brexucabtagene Autoleuce | 4                | 2              |
| 25 | 66  | F   | white    | T-FL                 | Experimental             | 0                | 1              |
| 26 | 33  | M   | white    | BL                   | Experimental             | 4                | 2              |
| 27 | 45  | M   | white    | DLBCL                | Experimental             | 0                | 0              |
| 28 | 64  | F   | white    | T-LPL                | Experimental             | 2                | 2              |
| 29 | 47  | F   | Hispanic | T-FL                 | Experimental             | 0                | 0              |
| 30 | 60  | M   | white    | DLBCL                | Experimental             | 0                | 1              |

Core Demographic and oncologic characteristics of the study cohort, by participant ID. For the patients who developed CRS, there was a median onset of 1 day after infusion (range 0 to 9

days). For the patients who developed ICANS, there was a median onset of 6 days (range 1 to 16). The experimental CAR product was a second generation CAR targeting CD19.

*Permutation testing: NfL vs Ferritin (during lymphodepletion and D1) Classification Accuracy for ICANS*

**A** Permutation Testing: AUC comparison (ICANS vs No ICANS) between baseline NfL and during lymphodepletion ferritin

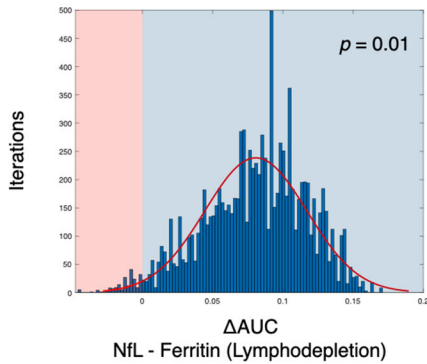

**B** Permutation Testing: AUC comparison (ICANS vs No ICANS) between baseline NfL and D1 ferritin

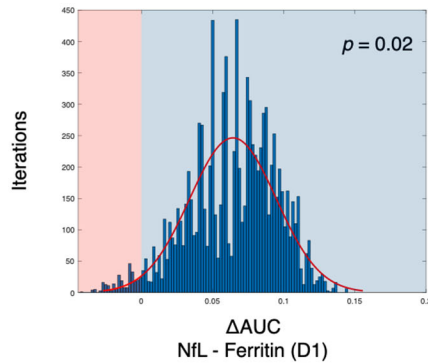

■ NfL has greater accuracy than ferritin ■ ferritin has greater accuracy than NfL

**C** Permutation Testing: AUC comparison (0-2 ICANS vs G3+ ICANS) between baseline NfL and during lymphodepletion ferritin

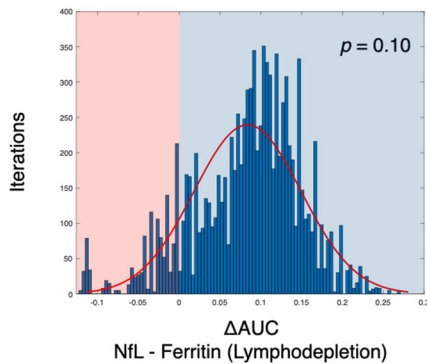

**D** Permutation Testing: AUC comparison (0-2 ICANS vs G3+ ICANS) between baseline NfL and D1 ferritin

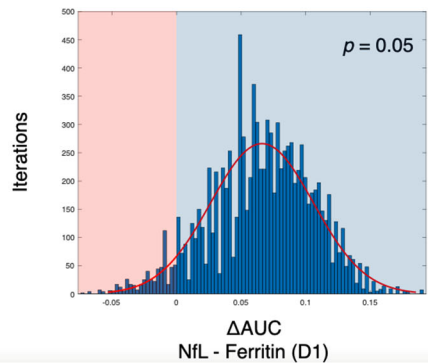

Histograms of the 10,000 permutations on 80% subsets of the data (i.e. 24 of 30 patients) comparing the difference in the AUC between NfL and ferritin for the development of ICANS (**A**, **B**) and for grade 3+ ICANS (**C**, **D**). Both NfL and ferritin had the highest AUC of available markers. An AUC difference greater than zero (blue) implies NfL has a greater AUC. An AUC difference less than zero (red) implies ferritin has a greater AUC.

Multivariate Lasso Regression: During Lymphodepletion Markers

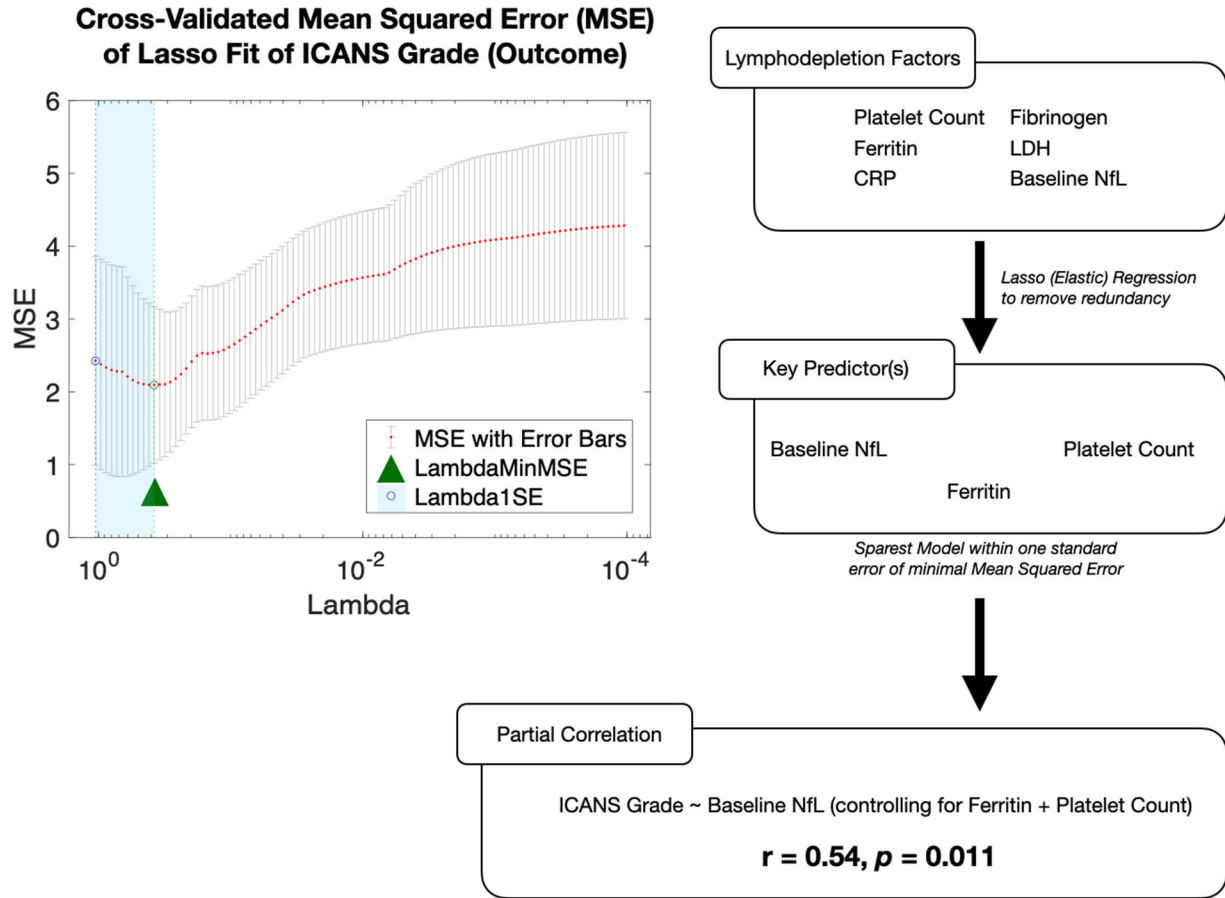

Cross-Validation Mean Squared Error plot reflecting Lasso (elastic) regression for lymphodepletion laboratory data and baseline NfL. Earlier reported Lasso regression (**Supplemental Fig 7**) included only all pre-treatment (i.e. pre-Infusion, pre-lymphodepletion) variables. It did not include data during lymphodepletion. Here Lasso regression was repeated using available lymphodepletion laboratory values and baseline NfL. Three predictors of interest were identified (NfL, Ferritin, and Platelet Count). Subsequent partial correlation examined the relationship between baseline NfL and ICANS grade, after accounting for ferritin and platelet count.

Multivariate Lasso Regression: D1 Markers Markers

Comparable results to above were obtained using D1 laboratory data instead of day of during lymphodepletion data: Again Baseline NFL, D1 ferritin, and D1 platelet count were identified using Lasso regression. After accounting for D1 ferritin and platelet count, baseline NfL remained correlated to ICANS grade ( $r = 0.58, p = 0.003$ ).

### Correlation between CRS and ICANS

Both CRS and ICANS are ordinal variables, warranting rank (Spearman) correlation evaluation. Rank correlation between ICANS grade and CRS grade showed a significant relationship ( $r = 0.49, p = 0.0056$ ). This is likely an underestimate as patients who developed CRS were all treated. Nonetheless, CRS is an important confound warranting further investigation using *a priori* defined models.

### A priori-defined Partial Correlations between Baseline NFL and ICANS Grade

Lasso regression and hierarchical clustering are data driven approaches to identify risk factors (or groups of risk factors) that are most related to ICANS grade. An alternative approach is the *a priori* definition of potential risk factors based on previously published data, such as CRS as outlined above. Partial correlations examine the relationship between baseline NFL and ICANS grade after accounting for these pre-defined risk factors. Note, ICANS grade is an ordinal, not continuous variable, hence the use of rank (Spearman) correlations over traditional linear models.

|                                                   |                                                                                                           |
|---------------------------------------------------|-----------------------------------------------------------------------------------------------------------|
| ICANS ~ Baseline NFL ( $r = 0.74, p = 0.000003$ ) |                                                                                                           |
| Pre-Infusion                                      | - Controlling for Age ( $r = 0.73, p = 0.000006$ )                                                        |
|                                                   | - Controlling for Age, Tumor Burden ( $r = 0.73, p = 0.0002$ )                                            |
|                                                   | - Controlling for Age, Tumor Burden, Neuro Disease ( $r = 0.72, p = 0.0004$ )                             |
| ALL:                                              | - Controlling for Age, Tumor Burden, Neuro Disease, CRS, Ferritin, Plt, LDH, Fib ( $r = 0.59, p = 0.04$ ) |
| Post-Infusion                                     | - Controlling for CRS, Ferritin, Plt, LDH, Fib ( $r = 0.64, p = 0.004$ )                                  |
|                                                   | - Controlling for CRS, Ferritin, Plt, LDH ( $r = 0.51, p = 0.02$ )                                        |
|                                                   | - Controlling for CRS, Ferritin, Plt ( $r = 0.58, p = 0.003$ )                                            |
|                                                   | - Controlling for CRS, Ferritin ( $r = 0.56, p = 0.004$ )                                                 |
|                                                   | - Controlling for CRS ( $r = 0.73, p = 0.000006$ )                                                        |

Neuro Disease = History of Neurologic disease other than neuropathy

CRS = History of Cytokine Release Syndrome

Plt = Platelet Count

LDH = Lactate Dehydrogenase

Fib = Fibrinogen

### Subgroup Analysis: Axi-cel

Subgroup analysis of NfL levels in our 19 patients treated with Axi-cel demonstrate excellent AUC for the development of any grade ICANS (0.95) and G3+ ICANS (0.85), potentially serving as a source of bias.

### *Serial Changes in NfL Across Time-points*

There was significant group differences between patients with and without ICANS at lymphodepletion ( $p = 0.0016$ ), D3 ( $p = 0.004$ ), D7 ( $p = 0.0188$ ), D14 ( $p = 0.003$ ), and D30 ( $p = 0.0011$ ). All  $p$  values survived FDR correction for multiple comparisons. A trend was observed at D1 ( $p = 0.095$ ) (**Figure 1G**). However, there was no significant change from baseline to post-infusion in patients who developed ICANS. This may be a reflection of power.

### REFERENCES

1. Butt O, Zhou A, Schindler S, Fagan A, Dipersio J, Ghobadi A, Ances B. NCMP-24. PRE-INFUSION NEUROFILAMENT LIGHT CHAIN (NFL) LEVELS PREDICT THE DEVELOPMENT OF IMMUNE EFFECTOR CELL-ASSOCIATED NEUROTOXICITY SYNDROME (ICANS). *Neuro Oncol.* 2020 Nov 9;22(Suppl 2):ii127–8. doi: 10.1093/neuonc/noaa215.535. PMID: PMC7651371.
2. Dean EA, Mhaskar RS, Lu H, Mousa MS, Krivenko GS, Lazaryan A, Bachmeier CA, Chavez JC, Nishihori T, Davila ML, Khimani F, Liu HD, Pinilla-Ibarz J, Shah BD, Jain MD, Balagurunathan Y, Locke FL. High metabolic tumor volume is associated with decreased efficacy of axicabtagene ciloleucel in large B-cell lymphoma. *Blood Adv.* 2020 Jul 28;4(14):3268-3276. doi: 10.1182/bloodadvances.2020001900. PMID: 32702097; PMID: PMC7391155.
3. Khalil M, Teunissen CE, Otto M, Piehl F, Sormani MP, Gatringer T, Barro C, Kappos L, Comabella M, Fazekas F, Petzold A, Blennow K, Zetterberg H, Kuhle J. Neurofilaments as biomarkers in neurological disorders. *Nat Rev Neurol.* 2018 Oct;14(10):577-589. doi: 10.1038/s41582-018-0058-z. PMID: 30171200.
4. Sasanelli M, Meignan M, Haioun C, Berriolo-Riedinger A, Casasnovas RO, Biggi A, Gallamini A, Siegel BA, Cashen AF, Véra P, Tilly H, Versari A, Itti E. Pretherapy metabolic tumour volume is an independent predictor of outcome in patients with diffuse large B-cell lymphoma. *Eur J Nucl Med Mol Imaging.* 2014



### C. Supplemental Table. Expanded Patient Characteristics

|                                                          | All<br>(n = 30) | No ICANS<br>(n = 19) | G1-2 ICANS<br>(n = 4) | G3+ ICANS<br>(n=7) |
|----------------------------------------------------------|-----------------|----------------------|-----------------------|--------------------|
| Age, median (range)                                      | 64 [22-80]      | 64 [22-80]           | 62.5 [58-78]          | 69 [33-79]         |
| Sex (n (%) Female)                                       | 12 (40.0%)      | 7 (36.8%)            | 3 (75%)               | 2 (28.6%)          |
| Race (n (%))                                             |                 |                      |                       |                    |
| Caucasian                                                | 26 (86.7%)      | 16 (84.2%)           | 4 (100%)              | 6 (85.7%)          |
| Other                                                    | 4 (13.3%)       | 3 (15.8%)            | 0 (0%)                | 1 (14.3%)          |
| Cancer History                                           |                 |                      |                       |                    |
| n (%) DLBCL                                              | 23 (76.7%)      | 15 (78.9%)           | 3 (75%)               | 5 (71.4%)          |
| Median Stage at Initial Diagnosis                        | 3               | 3                    | 3                     | 4                  |
| Tumor Burden*, mm <sup>3</sup> (mean (std))              | 133.1 (233)     | 140.2 (288)          | 61.47 (51.8)          | 152.5 (133)        |
| CNS Involvement (n (%))                                  | 7 (23.3%)       | 5 (26.3%)            | 2 (50%)               | 0 (0%)             |
| Hx of Vincristine Exposure (n (%))                       | 28 (93.3%)      | 18 (94.7%)           | 4 (100%)              | 6 (85.7%)          |
| Hx of Cytabrine Exposure (n (%))                         | 6 (20%)         | 3 (15.8%)            | 1 (25%)               | 2 (28.6%)          |
| Hx of High-dose Methotrexate (n (%))                     | 5 (16.7%)       | 3 (15.8%)            | 1 (25%)               | 1 (14.3%)          |
| Hx of Intrathecal Methotrexate (n (%))                   | 5 (16.7%)       | 3 (15.8%)            | 1 (25%)               | 1 (14.3%)          |
| Hx of CNS Radiotherapy (n (%))                           | 3 (10%)         | 3 (15.8%)            | 0 (0%)                | 0 (0%)             |
| Neurologic History                                       |                 |                      |                       |                    |
| Hx of Neurologic disease, not relating to cancer (n (%)) | 5 (16.7%)       | 2 (10.5%)            | 2 (50%)               | 1 (14.3%)          |
| Hx of Neuropathy (n (%))                                 | 17 (56.7%)      | 10 (52.6%)           | 3 (75%)               | 4 (57.1%)          |
| CAR T Product                                            |                 |                      |                       |                    |
| Axicabtagene Ciloleucel (n (%))                          | 19 (63.3%)      | 12 (63.2%)           | 3 (75%)               | 4 (57.1%)          |
| Tisagenlecleucel (n (%))                                 | 4 (13.3%)       | 3 (15.8%)            | 0 (0%)                | 1 (14.3%)          |
| Brexucabtagene Autoleucel (n (%))                        | 1 (3.33%)       | 0 (0%)               | 0 (0%)                | 1 (14.3%)          |
| Experimental CD19 CAR (n (%))                            | 6 (20%)         | 4 (21.1%)            | 1 (25%)               | 1 (14.3%)          |

**eTable.** Demographic and oncologic characteristics of the study cohort, with the ICANS cohort subdivided into low grade (G1-2) and high grade (G3+). \*Mean tumor volume was derived from total lesion burden on pre-infusion positron emission tomography (PET) scans using a 41% maximum standard uptake value (SUV) threshold (1,2); DLBL - Diffuse large B-cell lymphoma; CAR - Chimeric antigen receptor; CD19 - Cluster of Differentiation 19; CNS – Central nervous system; ICANS - Immune effector cell-associated neurotoxicity syndrome; Hx – History; std – standard deviation

1. Dean EA, Mhaskar RS, Lu H, Mousa MS, Krivenko GS, Lazaryan A, Bachmeier CA, Chavez JC, Nishihori T, Davila ML, Khimani F, Liu HD, Pinilla-Ibarz J, Shah BD, Jain MD, Balagurunathan Y, Locke FL. High metabolic tumor volume is associated with decreased efficacy of axicabtagene

ciloleucel in large B-cell lymphoma. *Blood Adv.* 2020 Jul 28;4(14):3268-3276. doi: 10.1182/bloodadvances.2020001900. PMID: 32702097; PMCID: PMC7391155.

2. Sasanelli M, Meignan M, Haioun C, Berriolo-Riedinger A, Casasnovas RO, Biggi A, Gallamini A, Siegel BA, Cashen AF, Véra P, Tilly H, Versari A, Itti E. Pretherapy metabolic tumour volume is an independent predictor of outcome in patients with diffuse large B-cell lymphoma. *Eur J Nucl Med Mol Imaging.* 2014

## D. Supplemental Figures

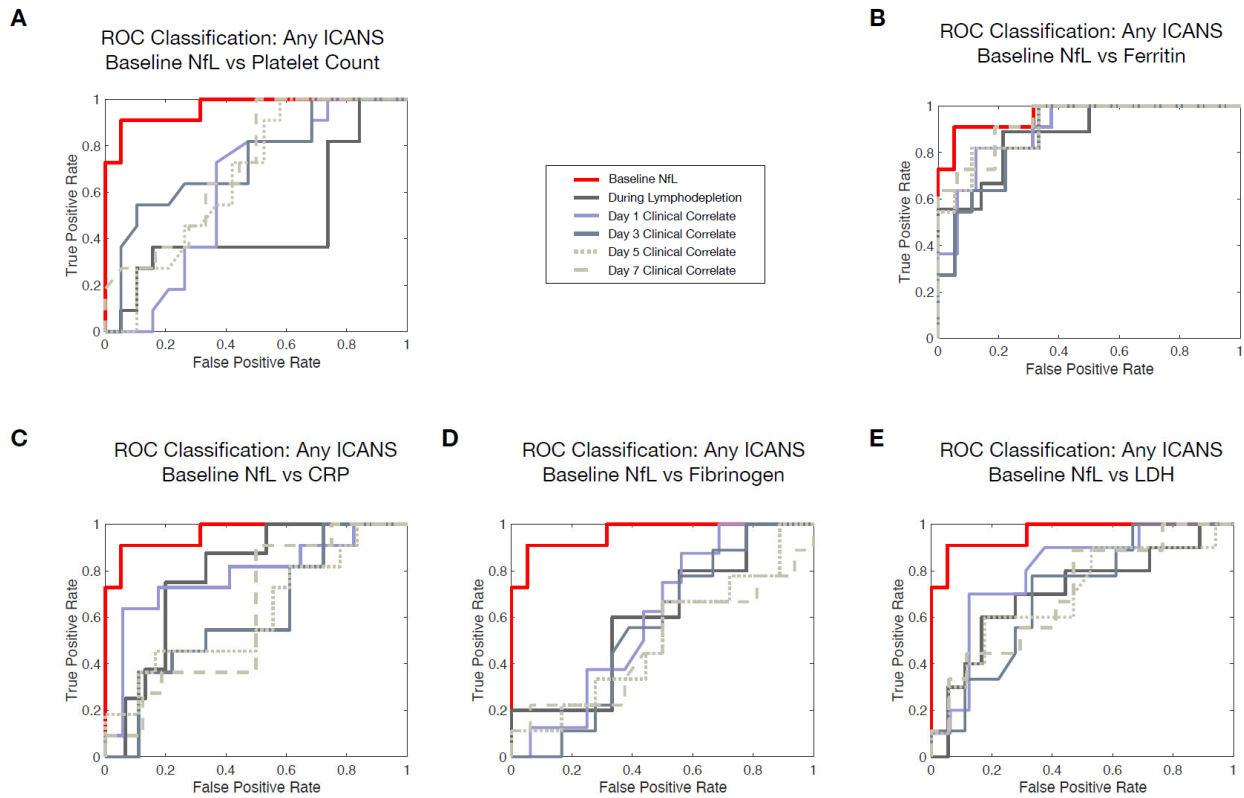

**eFigure 1.** Receiver operating characteristic curve classification of patients who develop any grade ICANS (1+) vs grade 0 for (A) Platelet Count, (B) Ferritin, (C) CRP, (D) Fibrinogen, (E) LDH. Five time-points are compared vs baseline NfL levels.

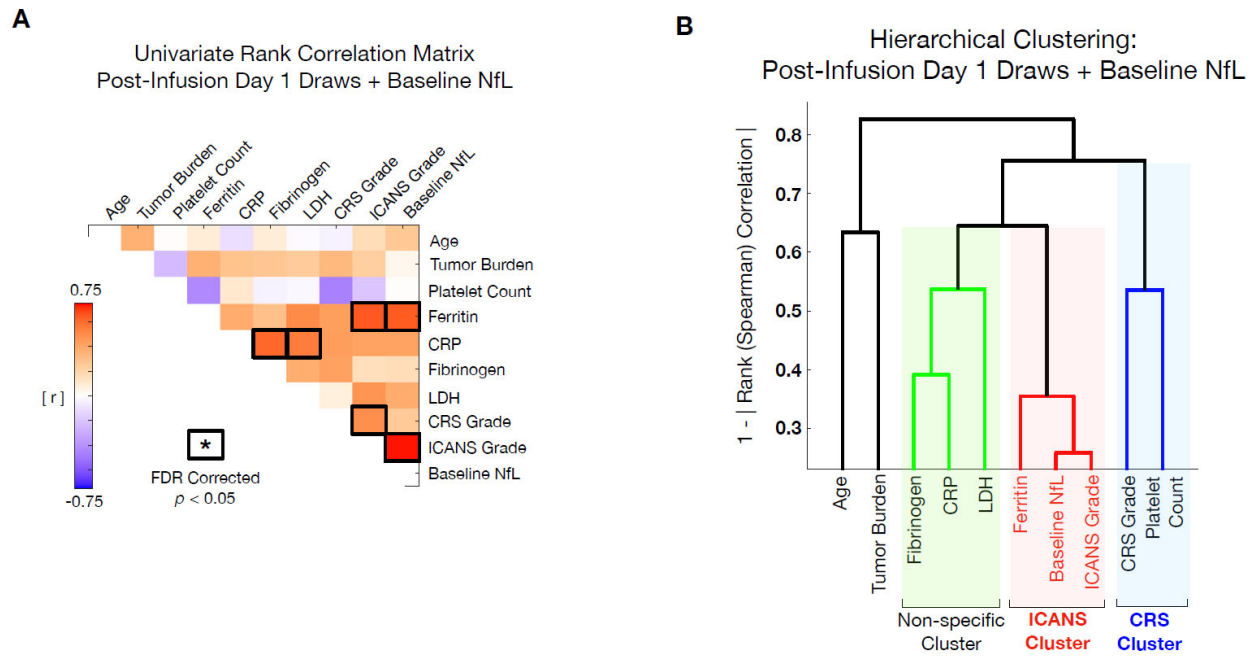

**eFigure 2.** (A) Univariate rank (Spearman’s) cross-correlation matrix comparing **post-infusion day 1 (D1)** blood biomarkers to baseline NfL, age, and total tumor burden. Pairings which pass multiple comparison correction using false discovery rate (FDR) are outlined. (B) Hierarchical clustering of the same terms in (A). Clusters associating with ICANS labeled in red.

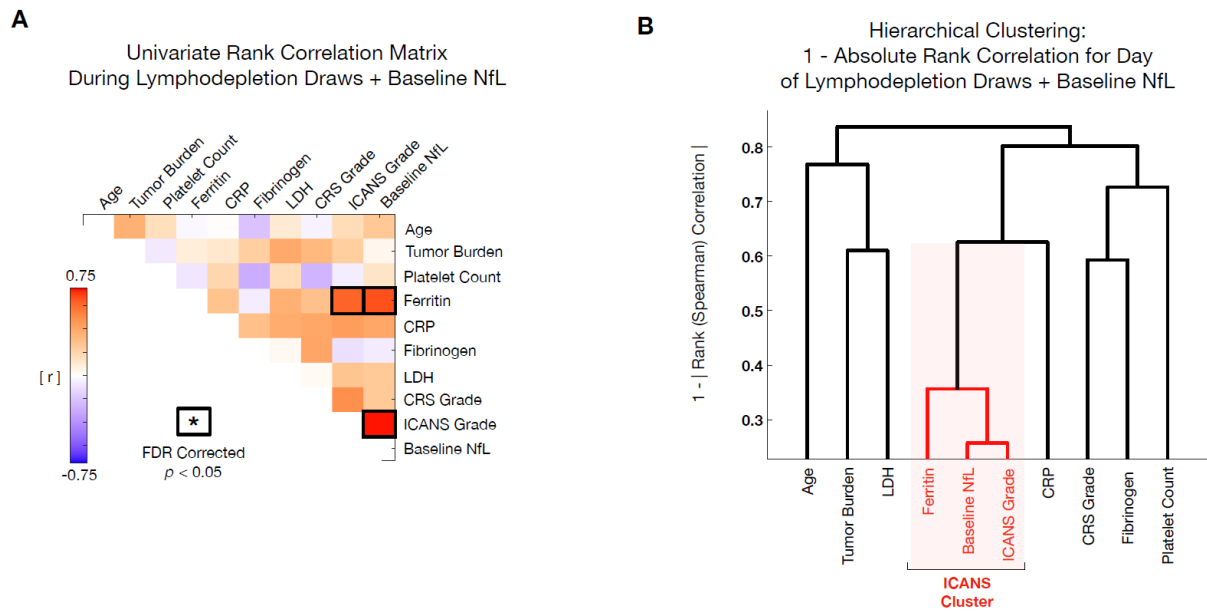

**eFigure 3.** (A) Univariate rank (Spearman’s) cross-correlation matrix comparing **during lymphodepletion** blood biomarkers to baseline NfL, age, and total tumor burden. Pairings which pass multiple comparison correction using false discovery rate (FDR) are outlined. (B) Hierarchical clustering of the same terms in (A). Clusters associating with ICANS labeled in red.

**A** ROC Classification: **Grade 3+ ICANS**  
Baseline NfL vs  
Post-Infusion Day 1 Markers

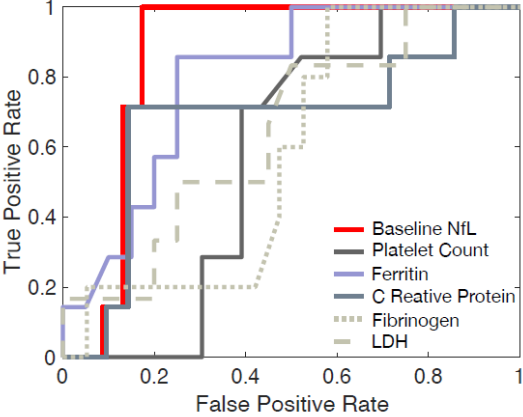

**eFigure 4.** Receiver operating characteristic curve classification of patients who develop grade 3+ ICANS vs grade 0-2 ICANS for baseline NfL and available post-infusion day 1 (D1) markers

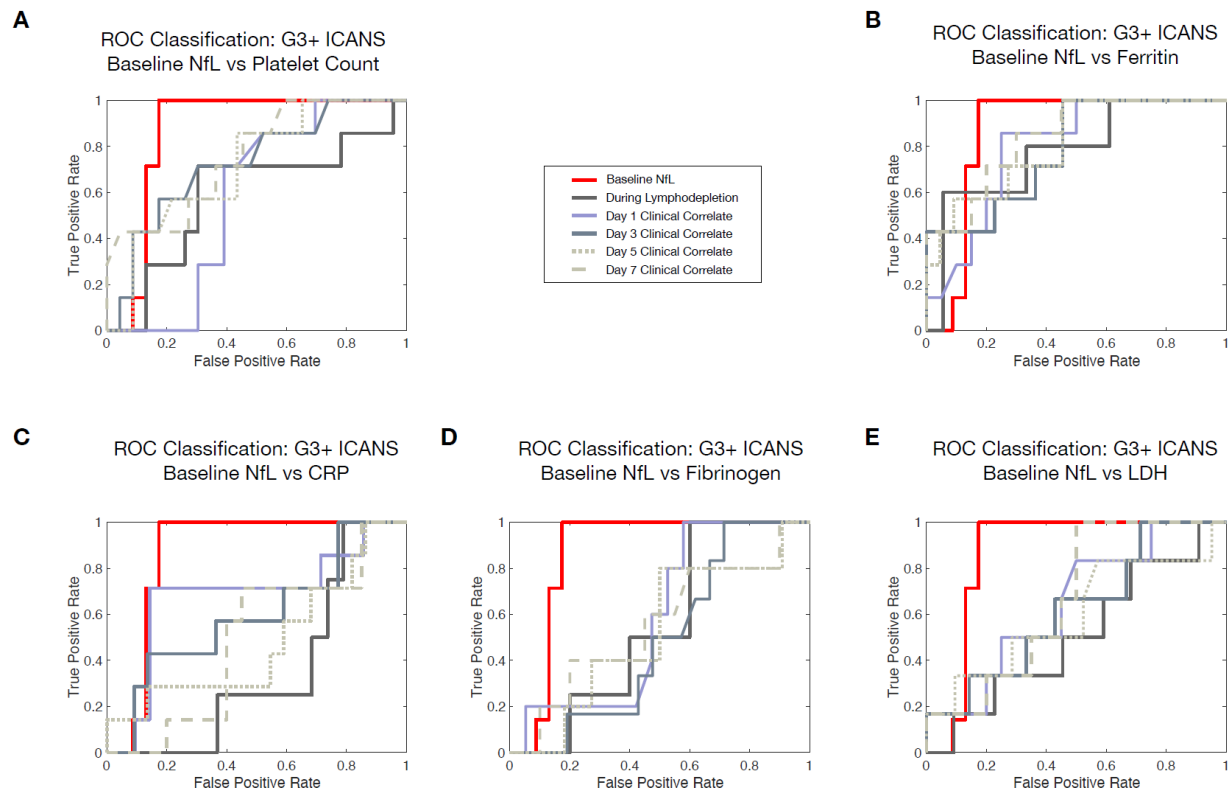

**eFigure 5.** Receiver operating characteristic curve classification of patients who develop grade 3+ ICANS vs grade 0-2 for (A) Platelet Count, (B) Ferritin, (C) CRP, (D) Fibrinogen, and (E) LDH. Five time-points (during lymphodepletion, post-infusion day 1 (D1), D3, D5, D7) are compared vs baseline NfL levels

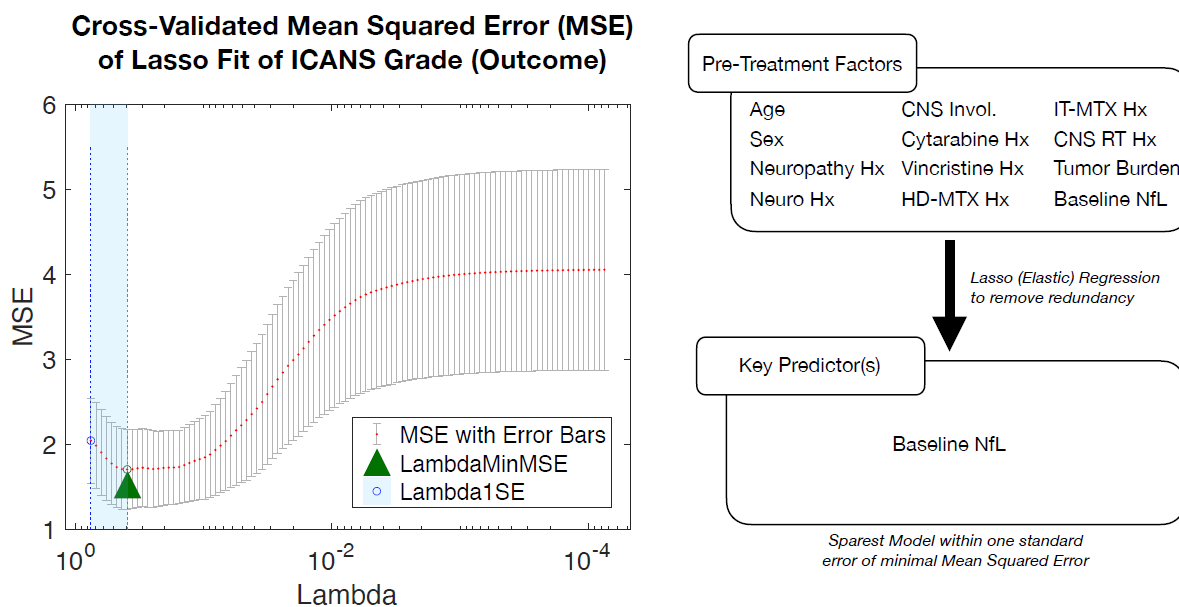

**eFigure 6.** Cross-Validation (12x) Mean Squared Error plot reflecting lasso (elastic) regression of 12 pre-treatment factors. A single predictor (log-normalized baseline NfL) is observed in the sparest model (green) within one standard deviation (blue) of the minimal mean squared error.



Univariate Rank Correlation:  
ICANS Grade vs Biomarkers at different  
timepoints

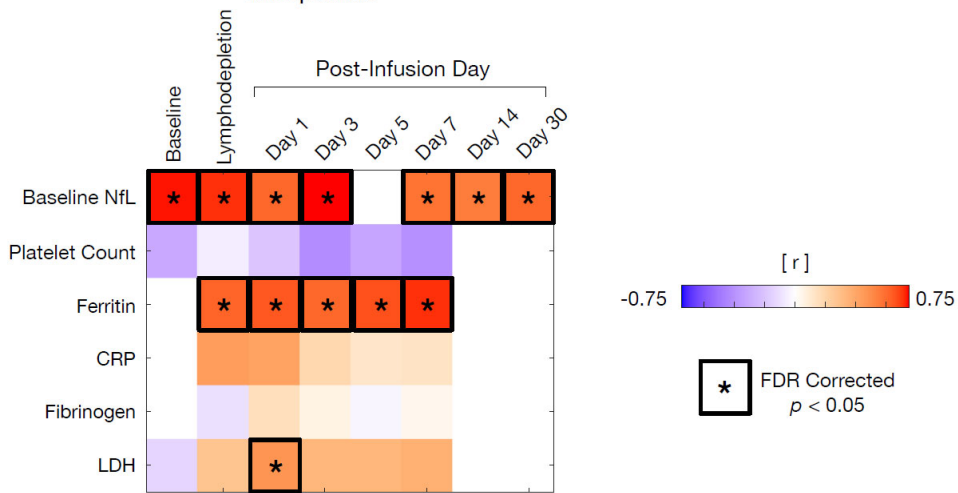

**eFigure 7.** Univariate correlation between ICANS grade and available biomarkers at different time-points relative to lymphodepletion and CAR T infusion. “Baseline” refers to prior to lymphodepletion, while “lymphodepletion” refers to blood draws obtained during lymphodepletion, but prior to CAR infusion. Significant relationships after correction for multiple comparisons using a FDR as outlined (\*).
